# Supplementary material for: Endovascular administration and magnetic retention of nanocapsules for improved brain delivery in large cerebral vascular models
Source: Royal Society of Chemistry journal article supplement (doi:10.1039/d5nr03429a), 2026-01-01
Supplement: d5nr03429a1.pdf [file d5nr03429a1.pdf]

## **ELECTRONIC SUPPLEMENTARY INFORMATION**

**Endovascular administration and magnetic retention of nanocapsules for improved brain delivery in large cerebral vascular models.**

**Grayston et al. Nanoscale.**

## **SUPPLEMENTARY METHODS**

### **Nanocapsules synthesis**

Briefly, SPIONs were embedded in the PLGA shell by adding oleic acid-coated SPIONs, with an average diameter of 9 nm, in the PLGA organic phase during the first emulsification following previously described methods.<sup>9,10</sup> Modified PLGA-Cy5 was also added in the organic phase in addition to the commercial PLGA (Resomer® RG502H, acid terminated, MW 7000-17000, Sigma-Aldrich, CAS: 26780-50-7). As the first aqueous phase, 50 µL of aqueous solution at physiological pH (EBM2, Lonza), were added during the double emulsion solvent evaporation method for a single NCs batch. The obtained NCs suspension in 2 mg/mL trehalose aqueous solution was lyophilized and stored at -80 °C until each experimental use. The NC were freshly dispersed at the desired concentration before use, vortexed for 1 min and sonicated in an ultrasound bath for 3 min at 83.3 W/L and 48 kHz.

### **Dynamic light scattering**

The hydrodynamic diameter of the nanocapsules was measured by dynamic light scattering (DLS) with a Zetasizer Nano ZS (Malvern Instruments, Malvern, UK). Samples were diluted to a final concentration of 0.1 mg/mL in ultrapure water and measured in triplicate at 25 °C.

### **Transmission electron microscopy**

The morphology of the magnetic nanocapsules was studied by transmission electron microscopy (TEM) using a JEOL JEM-1210 microscope. For sample preparation, a drop of a diluted suspension of magnetic PLGA-NC in ultrapure water (0.5 mg/mL) was placed onto a copper grid and allowed to settle for 5 min. The excess liquid was gently removed with filter paper, and the procedure was repeated 2 more times before imaging.

### **Magnetic characterization**

The magnetic properties of the PLGA-NC were measured in a superconducting quantum interference device (SQUID) (MPMS5XL magnetometer, Quantum Design, CA, United States). The nanocapsules in powder form (5 mg) were compacted into a spherical shape using PTFE tape and its hysteresis loops were measured at 10 and 300 K under a maximum applied magnetic field of  $\pm 60$  kOe.

## **Animals**

Pigs (Large White x Landrace cross) were purchased from the animal centre A. M. Animalia Bianya S.L. (Girona, Spain), entered in the register of breeding centres, suppliers and users of laboratory animals with the number G9900009 (GLP nº BPL808CAT). The animals were previously acclimatized to our facilities and housed in conventional pens for 7-10 days, with *ad libitum* water and fed 2 times a day with conventional pig's diet. The animals were housed with other pigs, and the pen's temperature was maintained at  $21\pm 2^{\circ}\text{C}$ . The relative humidity ranged from 40-60%, air renovation consisted of 10-15 air changes per hour, and the photoperiod was 12:12 h day/night. All animals were subjected to a clinical examination by the veterinary team, and underwent a fasting of 12 h prior to surgery, maintaining free access to water with diluted sucrose. The animals were kept under general anesthesia for the entire duration of the intervention and subsequent experiment to administer intra-arterial or intravenous NC as described in the main text.

## **3D printing**

Briefly, the neurovascular model manufacturing comprised the following steps: (i) medical image segmentation to generate the 3D geometry of the vascular anatomy, (ii) mesh modelling to prepare a printable anatomical model, (iii) 3D printing configuration, and (iv) post-printing processing. DICOM data from intravenous contrast computed tomography scans from anonymous patients were imported and loaded in the 3DSlicer software to obtain the preliminary 3D geometry of the model, through opacity threshold segmentation. Then, using the Autodesk Meshmixer software, the 3D geometry was simplified into anatomically relevant vessels for mechanical thrombectomy, that is to say, carotid arteries (CCAs, ECAs, ICAs), MCAs, anterior carotid arteries (ACAs), anterior

communicating artery (ACoA), vertebral arteries (VAs), basilar artery (BA), posterior cerebral arteries (PCAs), and posterior communicating arteries (PCoAs). The proximal and distal segments were adapted to create connection points of the model to the flow loop system, and 1 mm thickness was added to the vessel walls to provide consistency. Finally, mesh errors were corrected, and the virtual model was exported from Autodesk Meshmixer to PreForm to configure the printing material, resolution, optimal geometry orientation, and support structure for 3D printing. The model was printed with commercially available photopolymer clear resin (Clear, FormLabs, Boston, MA, USA) at a resolution of 100  $\mu\text{m}$  with a Form 3 Printer (FormLabs). For post-printing processing, the support structures were removed from the model, which was then immersed in isopropyl alcohol and exposed to 305 nm UV light at 60°C for 20 min. A temporal bone was also 3D-printed using the same methodology, using the scaffold material Durable resin (FormLabs) with a final average thickness of 4.46 mm (3.5-9.86 mm).

### **Fluorescence Molecular Imaging**

For *in vitro* FMI, a series of concentrations ranging from 0.1 mg/mL to 1.5 mg/mL of Cy5-labelled NC in 100  $\mu\text{L}$  of saline were prepared for each batch as well as a background control well (0 mg/mL) in a 96-well plate and imaged using an IVIS® Lumina LT Series III imaging system (Perkin Elmer, ( $\lambda_{\text{ex}}/\lambda_{\text{em}}$  640/732 nm, respectively); Waltham, MA). To evaluate the specific magnetic retention in the 3D-printed vascular model, circular ROIs were manually drawn on both MCAs and corrected by the TRE from the corresponding ROI in an empty vascular model. For *ex vivo* FMI, TRE was quantified on ROIs manually drawn for the whole pig brains or the corresponding ipsilateral and contralateral hemispheres.

## SUPPLEMENTARY FIGURES

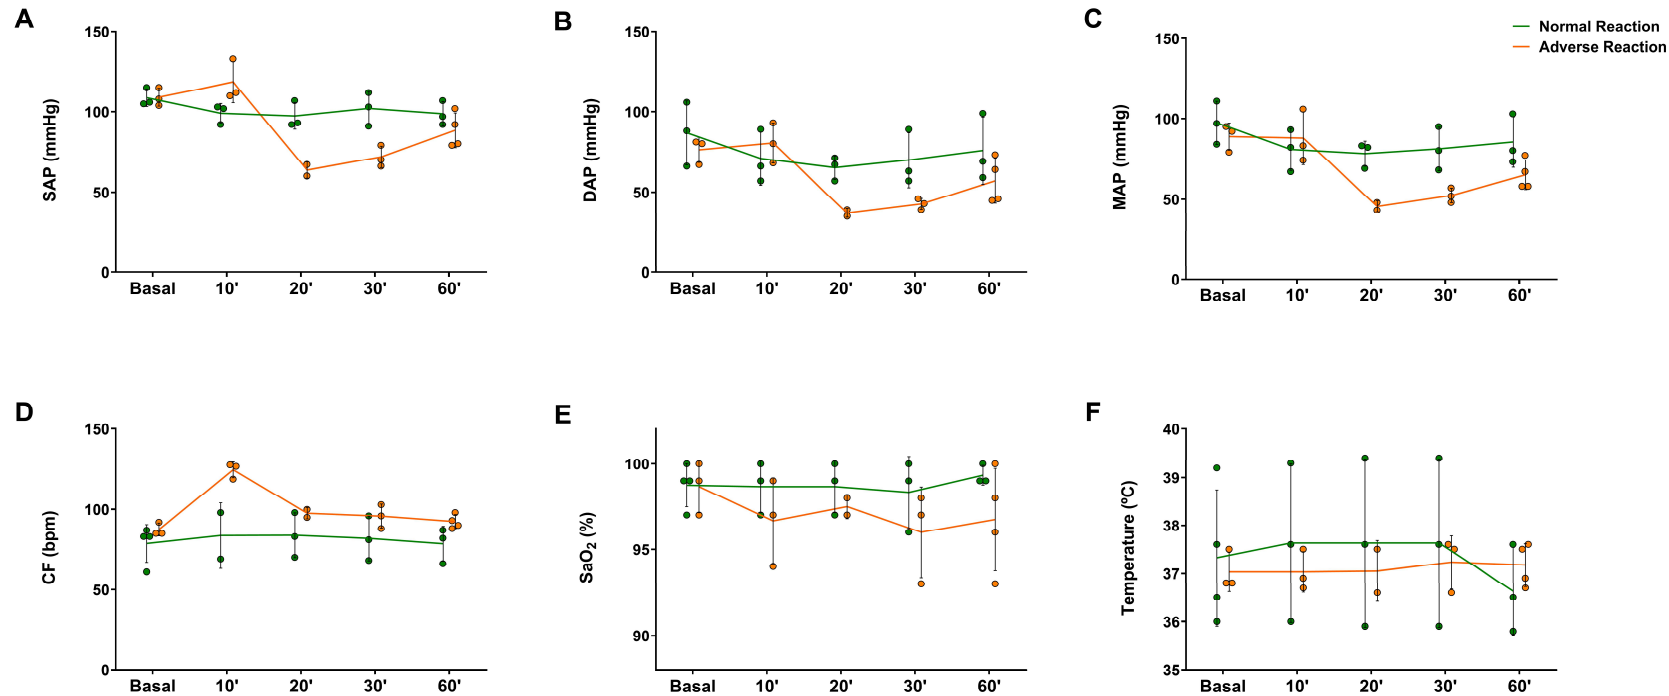

**Figure S1. Physiological parameters measured during nanocapsule infusion.** Timeline bar-graphs showing Systolic Arterial Pressure (SAP), Diastolic Arterial Pressure (DAP), Mean Arterial Pressure (MAP), Cardiac Frequency (CF), arterial oxygen saturation (SaO<sub>2</sub>) and body temperature at different time points during the 60 minutes nanocapsule infusion in subjects suffering adverse reaction or not. Data represent mean ± SD or median (IQR) and individual values are represented. Only individuals with the complete temporal profile (n=5/7 are represented).

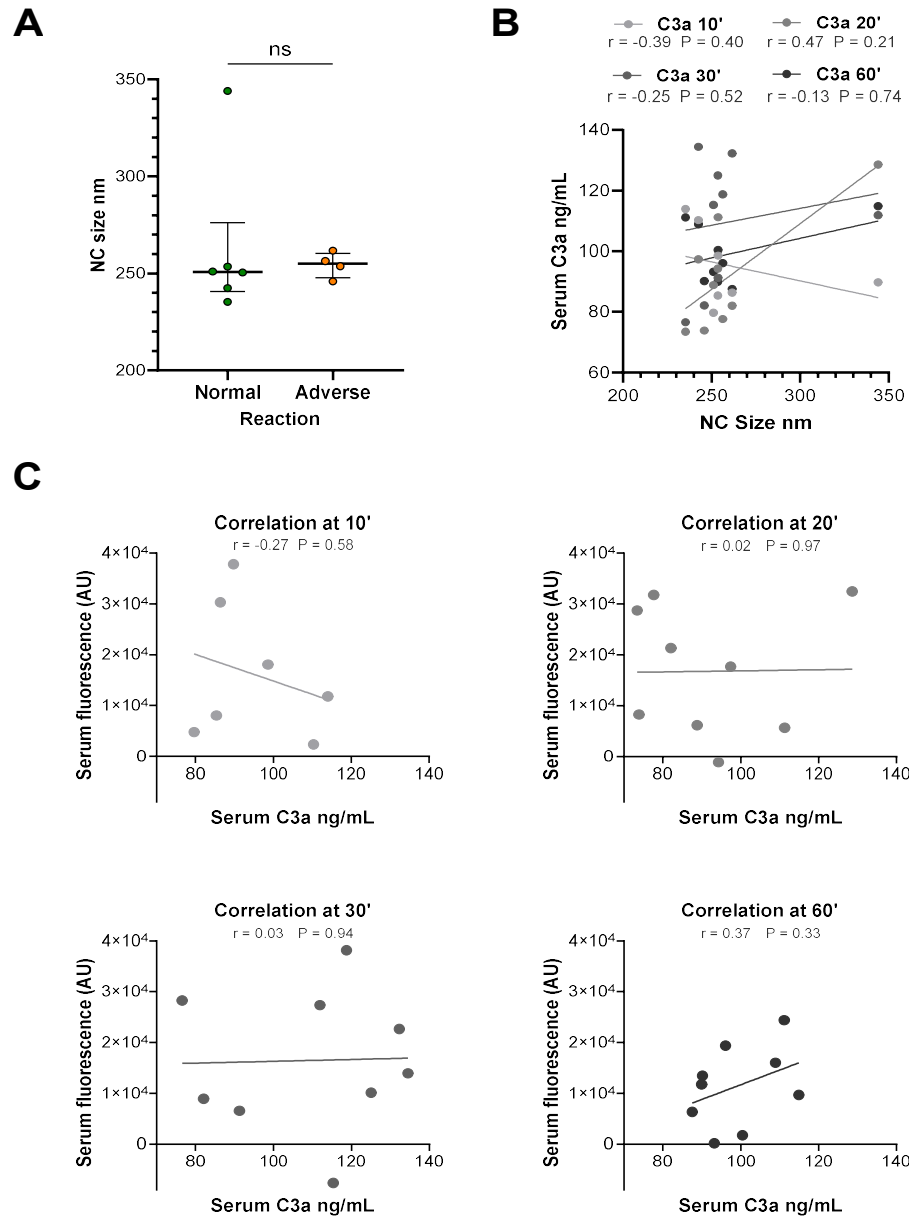

**Figure S2. Nanocapsule association with C3a levels and adverse effects during infusion.**

**A)** graph showing that NC size was similar in animals suffering normal or adverse reactions post NC infusion. Data is represented as median (IQR). **B)** NC size correlation with serum complement fragment C3a levels at different timepoints during NC infusion. **C)** Serum C3a levels correlation with Cy5+ NC fluorescence at different timepoints during NC infusion. No significance was observed.

## SUPPLEMENTARY DATA SUPPORTING THE EXPERIMENTAL ANALYSIS

### Nanocapsule Size by batch.

| Batch ID | Size (nm) | Polydispersity index (PDI) | Route | Batch ID | Size (nm) | Polydispersity index (PDI) | Route |
|----------|-----------|----------------------------|-------|----------|-----------|----------------------------|-------|
| NC219    | 256.0     | 0.13                       | IA    | ASNC051  | 260.0     | 0.12                       | IV    |
| NC224    | 466.0     | 0.45                       | IA    | ASNC052  | 253.0     | 0.15                       | IV    |
| NC225    | 310.0     | 0.26                       | IA    | ASNC053  | 249.0     | 0.14                       | IV    |
| NC251    | 276.0     | 0.20                       | IA    | ASNC103  | 253.5     | 0.16                       | IA    |
| NC252    | 256.0     | 0.15                       | IA    | ASNC104  | 245.7     | 0.18                       | IV    |
| NC253    | 260.0     | 0.15                       | IA    | ASNC105  | 259.2     | 0.19                       | IA    |
| NC254    | 269.0     | 0.16                       | IA    | ASNC106  | 246.1     | 0.15                       | IV    |
| NC257    | 229.0     | 0.10                       | IA    | ASNC110  | 237.3     | 0.19                       | IV    |
| ASNC048  | 243.0     | 0.10                       | IV    | ASNC112  | 233.4     | 0.20                       | IV    |
| ASNC049  | 247.0     | 0.11                       | IV    | ASNC124  | 244.0     | 0.12                       | IA    |
| ASNC050  | 242.0     | 0.12                       | IV    | ASNC128  | 257.0     | 0.12                       | IA    |

## Nanocapsule Fluorescence Quantification by batch.

| NC concentration | ROI TRE                                          |          |          |          |          |          |          |          |          |          |
|------------------|--------------------------------------------------|----------|----------|----------|----------|----------|----------|----------|----------|----------|
| (mg/mL)          | NC batches used for intraarterial administration |          |          |          |          |          |          |          |          |          |
|                  | NC219                                            | NC251    | NC252    | NC253    | NC254    | NC257    | ASNC103  | ASNC105  | ASNC124  | ASNC128  |
| 0                | 1.0705E+11                                       | 0        | 0        | 0        | 0        | 0        | 0        | 0        | 0        | 0        |
| 0.1              | 2.151E+12                                        | 2.01E+12 | 2.29E+12 | 2.47E+12 | 3.29E+12 | 2.41E+12 | 2.85E+12 | 1.59E+12 | 1.8E+12  | 2.23E+12 |
| 0.25             | 4.744E+12                                        | 4.6E+12  | 5.74E+12 | 6.92E+12 | 7.59E+12 | 5.28E+12 | 5.53E+12 | 3.36E+12 | 3.63E+12 | 4.32E+12 |
| 0.5              | 8.953E+12                                        | 8.45E+12 | 1E+13    | 1.23E+13 | 1.57E+13 | 1.13E+13 | 7.75E+12 | 6.79E+12 | 6.36E+12 | 7.91E+12 |
| 0.75             | 1.452E+13                                        | 1.4E+13  | 1.55E+13 | 1.88E+13 | 2.46E+13 | 1.73E+13 | 1.35E+13 | 1.11E+13 | 8.52E+12 | 1.13E+13 |
| 1                | 1.8325E+13                                       | 1.76E+13 | 2.14E+13 | 2.5E+13  | 3.16E+13 | 2.15E+13 | 1.71E+13 | 1.46E+13 | 1.08E+13 | 1.49E+13 |
| 1.5              | 2.5055E+13                                       | 2.43E+13 | 2.9E+13  | 3.3E+13  | 3.98E+13 | 3.23E+13 | 2.81E+13 | 2.38E+13 | 1.55E+13 | 2.02E+13 |
|                  |                                                  |          |          |          |          |          |          |          |          |          |
|                  | ASNC048                                          | ASNC049  | ASNC050  | ASNC051  | ASNC052  | ASNC053  | ASNC104  | ASNC106  | ASNC110  | ASNC112  |
| 0                | 0                                                | 0        | 0        | 0        | 0        | 0        | 0        | 0        | 0        | 0        |
| 0.1              | 2.06E+12                                         | 2.43E+12 | 1.55E+12 | 2.7E+12  | 2.91E+12 | 3.27E+12 | 2.34E+12 | 2.12E+12 | 2.43E+12 | 2.38E+12 |
| 0.25             | 6.29E+12                                         | 6.84E+12 | 4.94E+12 | 8.2E+12  | 8.59E+12 | 8.64E+12 | 5.2E+12  | 5.07E+12 | 6.13E+12 | 5.03E+12 |
| 0.5              | 6.66E+12                                         | 9.34E+12 | 6.94E+12 | 9.97E+12 | 9.42E+12 | 9.46E+12 | 9.66E+12 | 1.14E+13 | 8.6E+12  | 8.81E+12 |
| 0.75             | 1.21E+13                                         | 1.51E+13 | 8.43E+12 | 1.63E+13 | 1.69E+13 | 1.59E+13 | 1.53E+13 | 1.66E+13 | 1.39E+13 | 1.24E+13 |
| 1                | 1.6E+13                                          | 1.92E+13 | 1.63E+13 | 2.3E+13  | 2.15E+13 | 2.03E+13 | 1.9E+13  | 2.27E+13 | 1.69E+13 | 1.73E+13 |
| 1.5              | 2.45E+13                                         | 2.88E+13 | 2.74E+13 | 3.15E+13 | 3.06E+13 | 2.94E+13 | 3.09E+13 | 1.79E+13 | 2.16E+13 | 2.34E+13 |



## Brain and Serum Fluorescence by Animal.

|       |                                                                       |                      |                      |                      |                          | IVIS                           |          |          |          |          |             |          |
|-------|-----------------------------------------------------------------------|----------------------|----------------------|----------------------|--------------------------|--------------------------------|----------|----------|----------|----------|-------------|----------|
|       | Administration Route                                                  |                      | Effect               |                      | Mean NC Size             | Total Radiant Efficiency (TRE) |          |          |          |          | Fold Change |          |
|       | Intravenous                                                           | Intraarterial        | Normal               | Adverse              | nm                       | Whole Brain                    | IV - L   | IV - R   | IA - IL  | IA - CL  | IV L/R      | IA IL/CL |
| PIG3  |                                                                       | x                    | x                    |                      | 344.0                    | 5.15E+13                       |          |          | 3.40E+13 | 1.74E+13 |             | 1.96     |
| PIG4  |                                                                       | x                    |                      | x                    | 253.7                    | 4.01E+14                       |          |          | 2.90E+14 | 1.11E+14 |             | 2.63     |
| PIG5  |                                                                       | x                    |                      | x                    | 261.7                    | 8.58E+14                       |          |          | 7.92E+14 | 6.58E+13 |             | 12.04    |
| PIG7  | x                                                                     |                      | x                    |                      | 242.5                    | 2.28E+13                       | 1.17E+13 | 1.11E+13 |          |          | 1.06        |          |
| PIG8  | x                                                                     |                      | x                    |                      | 253.5                    | 2.68E+13                       | 1.43E+13 | 1.25E+13 |          |          | 1.15        |          |
| PIG9  | x                                                                     |                      | x                    |                      | 251.0                    | 2.91E+13                       | 1.44E+13 | 1.47E+13 |          |          | 0.98        |          |
| PIG10 |                                                                       | x                    |                      | x                    | 256.4                    | 2.85E+13                       |          |          | 1.58E+13 | 1.27E+13 |             | 1.25     |
| PIG11 | x                                                                     |                      |                      | x                    | 245.9                    | 2.79E+13                       | 1.35E+13 | 1.44E+13 |          |          | 0.94        |          |
| PIG12 | x                                                                     |                      | x                    |                      | 235.4                    | 2.78E+13                       | 1.46E+13 | 1.32E+13 |          |          | 1.11        |          |
| PIG14 |                                                                       | x                    | x                    |                      | 250.5                    | 7.86E+13                       |          |          | 5.46E+13 | 2.41E+13 |             | 2.27     |
|       |                                                                       |                      |                      |                      |                          |                                |          |          |          |          |             |          |
|       | Serum fluorescence $\lambda_{ex}$ 650 nm / $\lambda_{em}$ 750 nm (AU) |                      |                      |                      | Serum C3a levels (ng/mL) |                                |          |          |          |          |             |          |
|       | Fluorescenc<br>e 10'                                                  | Fluorescenc<br>e 20' | Fluorescenc<br>e 30' | Fluorescenc<br>e 60' | C3a 10'                  | C3a 20'                        | C3a 30'  | C3a 60'  |          |          |             |          |
| PIG3  | 37817                                                                 | 32459                | 27344                | 9694                 | 89.74                    | 128.605                        | 111.927  | 114.89   |          |          |             |          |
| PIG4  | 18063                                                                 | 5629                 | 6551                 | 1763                 | 98.589                   | 111.252                        | 91.249   | 100.438  |          |          |             |          |
| PIG5  | 30333                                                                 | 21333                | 22667                | 6333                 | 86.36                    | 82.06                          | 132.318  | 87.556   |          |          |             |          |
| PIG7  | 2316                                                                  | 17644                | 13931                | 16007                | 110.305                  | 97.386                         | 134.483  | 108.941  |          |          |             |          |
| PIG8  | 8033                                                                  | -1163                | 10126                | 11775                | 85.367                   | 94.298                         | 125.04   | 89.942   |          |          |             |          |
| PIG9  | 4771                                                                  | 6135                 | -7651                | 172                  | 79.67                    | 88.81                          | 115.325  | 93.211   |          |          |             |          |
| PIG10 |                                                                       | 31774                | 38136                | 19399                |                          | 77.655                         | 118.748  | 96.118   |          |          |             |          |
| PIG11 |                                                                       | 8225                 | 8900                 | 13443                |                          | 73.862                         | 82.072   | 90.17    |          |          |             |          |
| PIG12 | 11790                                                                 | 28737                | 28250                | 24387                | 113.96                   | 73.411                         | 76.542   | 111.162  |          |          |             |          |
| PIG14 | 18528                                                                 | 34501                | 37011                | 41186                |                          |                                |          |          |          |          |             |          |

## Nanocapsule Quantification in Brain Samples.

| Count NCs / mm2       |         |      |      |          |      |       |       |      |      |       |      |      |
|-----------------------|---------|------|------|----------|------|-------|-------|------|------|-------|------|------|
|                       | IV-L    |      |      | IV-R     |      |       | IA-CL |      |      | IA-IL |      |      |
| PIG3                  |         |      |      |          |      |       | 0.05  | 0.28 | 2.34 | 0.25  | 0.26 | 0.71 |
| PIG4                  |         |      |      |          |      |       | 0.08  | 1.11 | 0.21 | 0.36  | 0.76 | 0.90 |
| PIG5                  |         |      |      |          |      |       | 0.68  | 0.29 | 0.04 | 0.98  | 0.72 | 0.84 |
| PIG7                  | 0.05    | 0.11 | 0.09 | 0.05     | 0.11 | 0.05  |       |      |      |       |      |      |
| PIG8                  | 0.00    | 0.95 | 0.00 | 1.24     | 0.53 | 0.02  |       |      |      |       |      |      |
| PIG9                  | 0.28    | 0.06 | 0.34 | 0.09     | 0.04 | 0.23  |       |      |      |       |      |      |
| PIG10                 |         |      |      |          |      |       | 0.28  | 0.65 | 0.04 | 0.17  | 0.27 | 0.08 |
| PIG11                 | 0.07    | 0.08 | 0.05 | 0.18     | 0.34 | 0.03  |       |      |      |       |      |      |
| PIG12                 | 0.12    | 0.03 | 0.12 | 0.73     | 0.00 | 0.02  |       |      |      |       |      |      |
| PIG14                 |         |      |      |          |      |       | 0.08  | 0.15 | 0.00 | 0.03  | 0.28 | 0.18 |
|                       |         |      |      |          |      |       |       |      |      |       |      |      |
|                       |         |      |      |          |      |       |       |      |      |       |      |      |
| Count NCs / Area - FC |         |      |      |          |      |       |       |      |      |       |      |      |
|                       | IV- L/R |      |      | IA-IL/CL |      |       |       |      |      |       |      |      |
| PIG3                  |         |      |      | 5.01     | 0.90 | 0.30  |       |      |      |       |      |      |
| PIG4                  |         |      |      | 4.28     | 0.69 | 4.34  |       |      |      |       |      |      |
| PIG5                  |         |      |      | 1.44     | 2.52 | 20.33 |       |      |      |       |      |      |
| PIG7                  | 0.88    | 1.06 | 0.60 |          |      |       |       |      |      |       |      |      |
| PIG8                  |         | 0.56 |      |          |      |       |       |      |      |       |      |      |
| PIG9                  | 0.32    | 0.63 | 0.68 |          |      |       |       |      |      |       |      |      |
| PIG10                 |         |      |      | 0.61     | 0.42 | 2.19  |       |      |      |       |      |      |
| PIG11                 | 2.60    | 4.22 | 0.52 |          |      |       |       |      |      |       |      |      |
| PIG12                 | 6.10    | 0.00 | 0.18 |          |      |       |       |      |      |       |      |      |
| PIG14                 |         |      |      | 0.35     | 1.86 |       |       |      |      |       |      |      |

## Fluorescence Quantification in the 3D-vascular Model

| Experiment # | Total Radiant Efficiency in MCA ROI |          |       |          |          |       |
|--------------|-------------------------------------|----------|-------|----------|----------|-------|
|              | No magnet                           |          |       | Magnet   |          |       |
|              | CL                                  | IL       | IL/CL | CL       | IL       | IL/CL |
| 3122020      |                                     |          |       | 3.18E+13 | 1.29E+14 | 4.05  |
| 15122021     |                                     |          |       | 3.24E+13 | 1.53E+14 | 4.71  |
| 16122021     |                                     |          |       | 1.31E+14 | 3.82E+14 | 2.91  |
| 6022024      |                                     |          |       | 1.3E+14  | 1.95E+14 | 1.5   |
| 5022024      | 1.02E+14                            | 1.11E+14 | 1.09  |          |          |       |
| 6022024      | 1.44E+14                            | 2.06E+14 | 1.43  |          |          |       |
| 7022024      | 1.24E+14                            | 1.88E+14 | 1.51  |          |          |       |
| 6032024      |                                     |          |       | 1.86E+14 | 3.11E+14 | 1.67  |
| 6032024      | 1.18E+14                            | 1.87E+14 | 1.59  |          |          |       |

## Vital Signs

[illegible]

[illegible]

| SaO2 (%)  | Infusion time | Pig 3 | Pig 7 | Pig 8 | Pig 9 | Normal Reaction (mean) |  | Pig 4* | Pig 5* | Pig 10* | Pig 11* | Adverse Reaction (mean) |
|-----------|---------------|-------|-------|-------|-------|------------------------|--|--------|--------|---------|---------|-------------------------|
|           | Basal         | 97    | 99    | 99    | 100   | <b>99</b>              |  | 99     | 97     | 100     |         | <b>99</b>               |
|           | 10 min        | 97    |       | 99    | 100   | <b>99</b>              |  | 99     | 97     |         | 94      | <b>97</b>               |
|           | 20 min        | 97    |       | 99    | 100   | <b>99</b>              |  | 97     | 98     |         |         | <b>98</b>               |
|           | 30 min        | 96    |       | 99    | 100   | <b>98</b>              |  | 97     | 98     |         | 93      | <b>96</b>               |
|           | Final         |       | 99    | 99    | 100   | <b>99</b>              |  | 96     | 98     | 100     | 93      | <b>97</b>               |
|           |               |       |       |       |       |                        |  |        |        |         |         |                         |
| Temp (°C) | Infusion time | Pig 3 | Pig 7 | Pig 8 | Pig 9 | Normal Reaction (mean) |  | Pig 4* | Pig 5* | Pig 10* | Pig 11* | Adverse Reaction (mean) |
|           | Basal         | 39    | 37    | 38    | 36    | <b>37</b>              |  | 38     | 37     | 37      |         | <b>37</b>               |
|           | 10 min        | 39    |       | 38    | 36    | <b>38</b>              |  | 38     | 37     |         | 37      | <b>37</b>               |
|           | 20 min        | 39    |       | 38    | 36    | <b>38</b>              |  | 38     | 37     |         |         | <b>37</b>               |
|           | 30 min        | 39    |       | 38    | 36    | <b>38</b>              |  | 38     | 37     |         | 38      | <b>37</b>               |
|           | Final         |       | 37    | 38    | 36    | <b>37</b>              |  | 38     | 37     | 37      | 38      | <b>37</b>               |
